# Supplementary material for: Mechanochemical Coupling in the Myosin Motor Domain. I. Insights from Equilibrium Active-Site Simulations
Source: PLOS journal article supplement (doi:10.1371/journal.pcbi.0030021), 2007-02-06
Supplement: S1 (10.1371/journal.pcbi.0030021.s001) [file journal.pcbi.0030021.s001]

# **Protocol S1:**Mechanochemical coupling in the myosin motor domain. I.

## Insights from equilibrium active-site simulations

### **A Sidechain distribution of P-loop, Switch I and Switch II**

To investigate the effect of ATP hydrolysis on the local flexibility of active-site residues, the sidechain distributions (Fig. S1-S3) are analyzed for both the ATP and ADP·P<sub>i</sub> state with the 1VOM simulations (closed active-site). In addition, the same quantities are also analyzed for the 1VOM-ATP simulation with a larger inner region (32 Å instead of 20 Å) to investigate whether the size of the GSBP inner region has a major impact on the active-site flexibility. As seen in Fig. S1-S3, little difference is found between simulations of different inner region size, except for a few residues and the effect is small in all cases. As to the effect of ATP hydrolysis, the only residue that has been substantially affected is Ser 237, which has a much broader distribution in the ADP·P<sub>i</sub> state, suggesting that the interaction with Mg<sup>2+</sup> is substantially reduced.

### **B Convergence of the active-site open/close PMFs**

As shown in Fig. S4, the calculated PMFs with nearly 4-5 times more simulation data are essentially identical with the original PMFs. This ensures that the computed PMFs are converged to a satisfactory degree.

### **C Figure Captions**

**Fig.S1-S3** Sidechain distributions in the P-loop (Fig. S1), Switch I (Fig. S2) and Switch II (Fig. S3) residues from different simulations.

**Fig. S4** Potentials of mean force for the open/close of the active site in the (a) 1FMW-ATP and (b) 1VOM-ATP simulations with different length of trajectories.

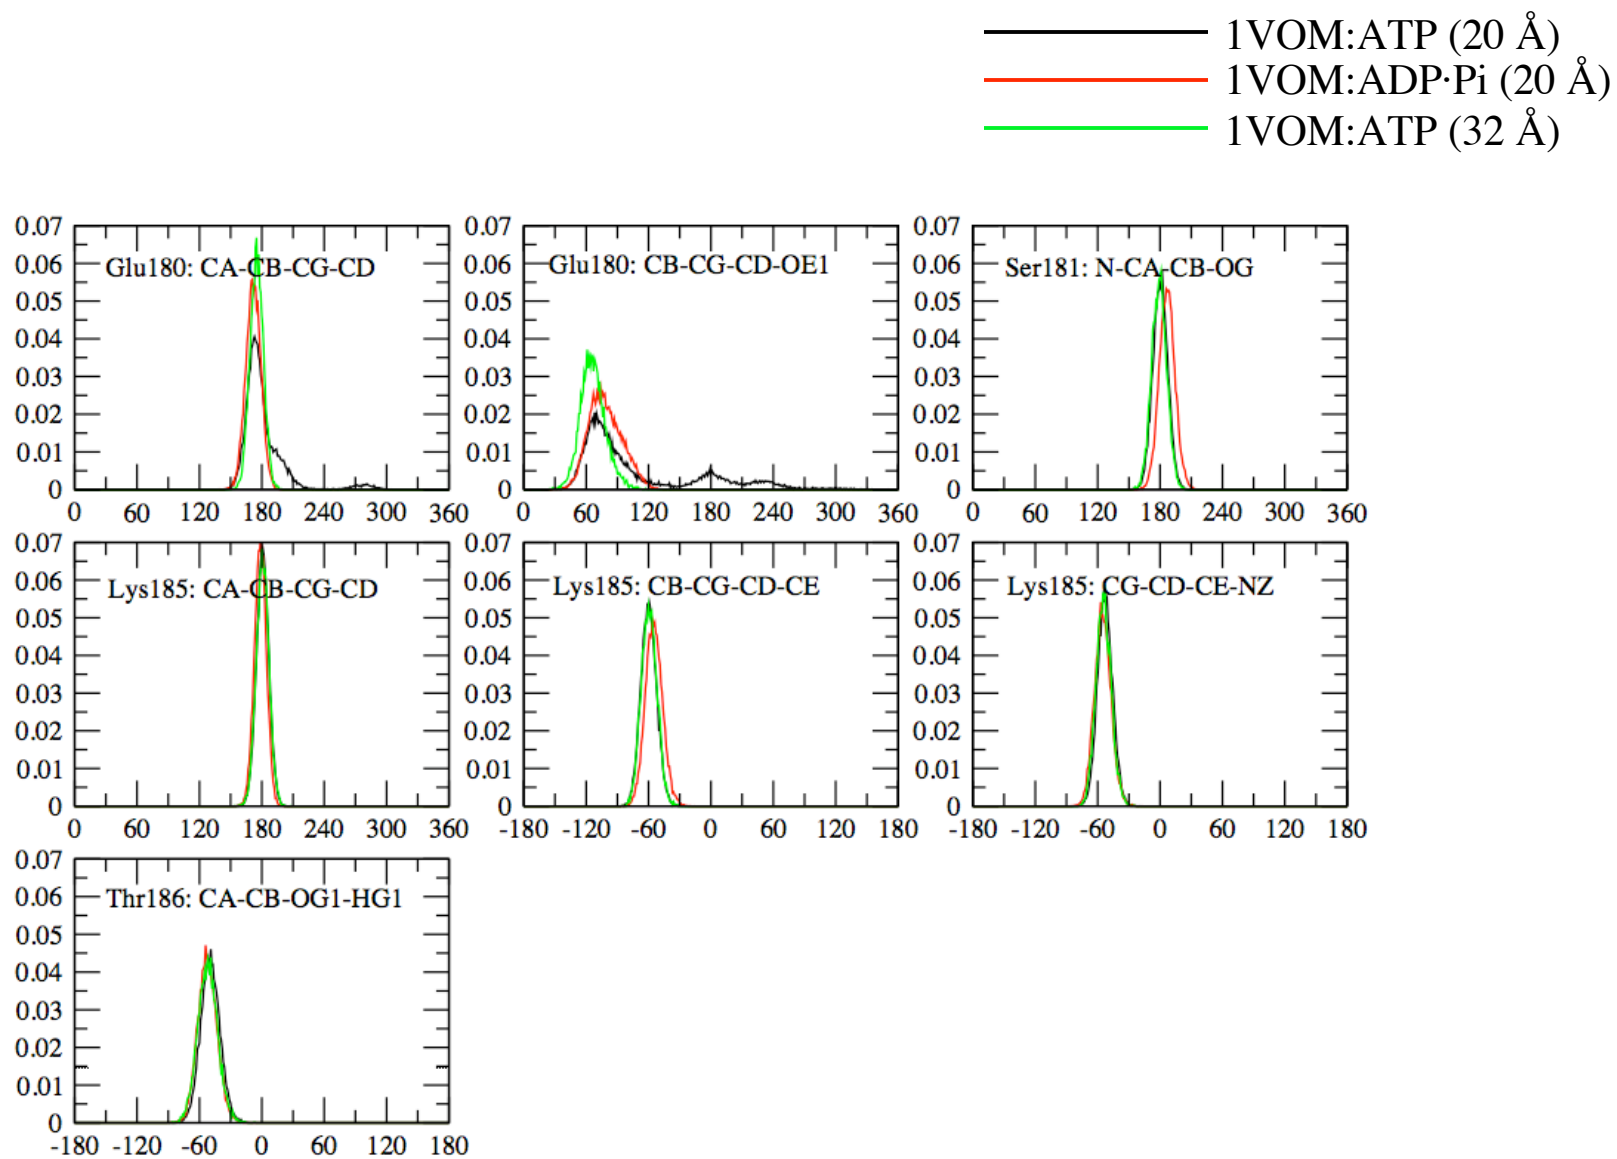

Fig. S1

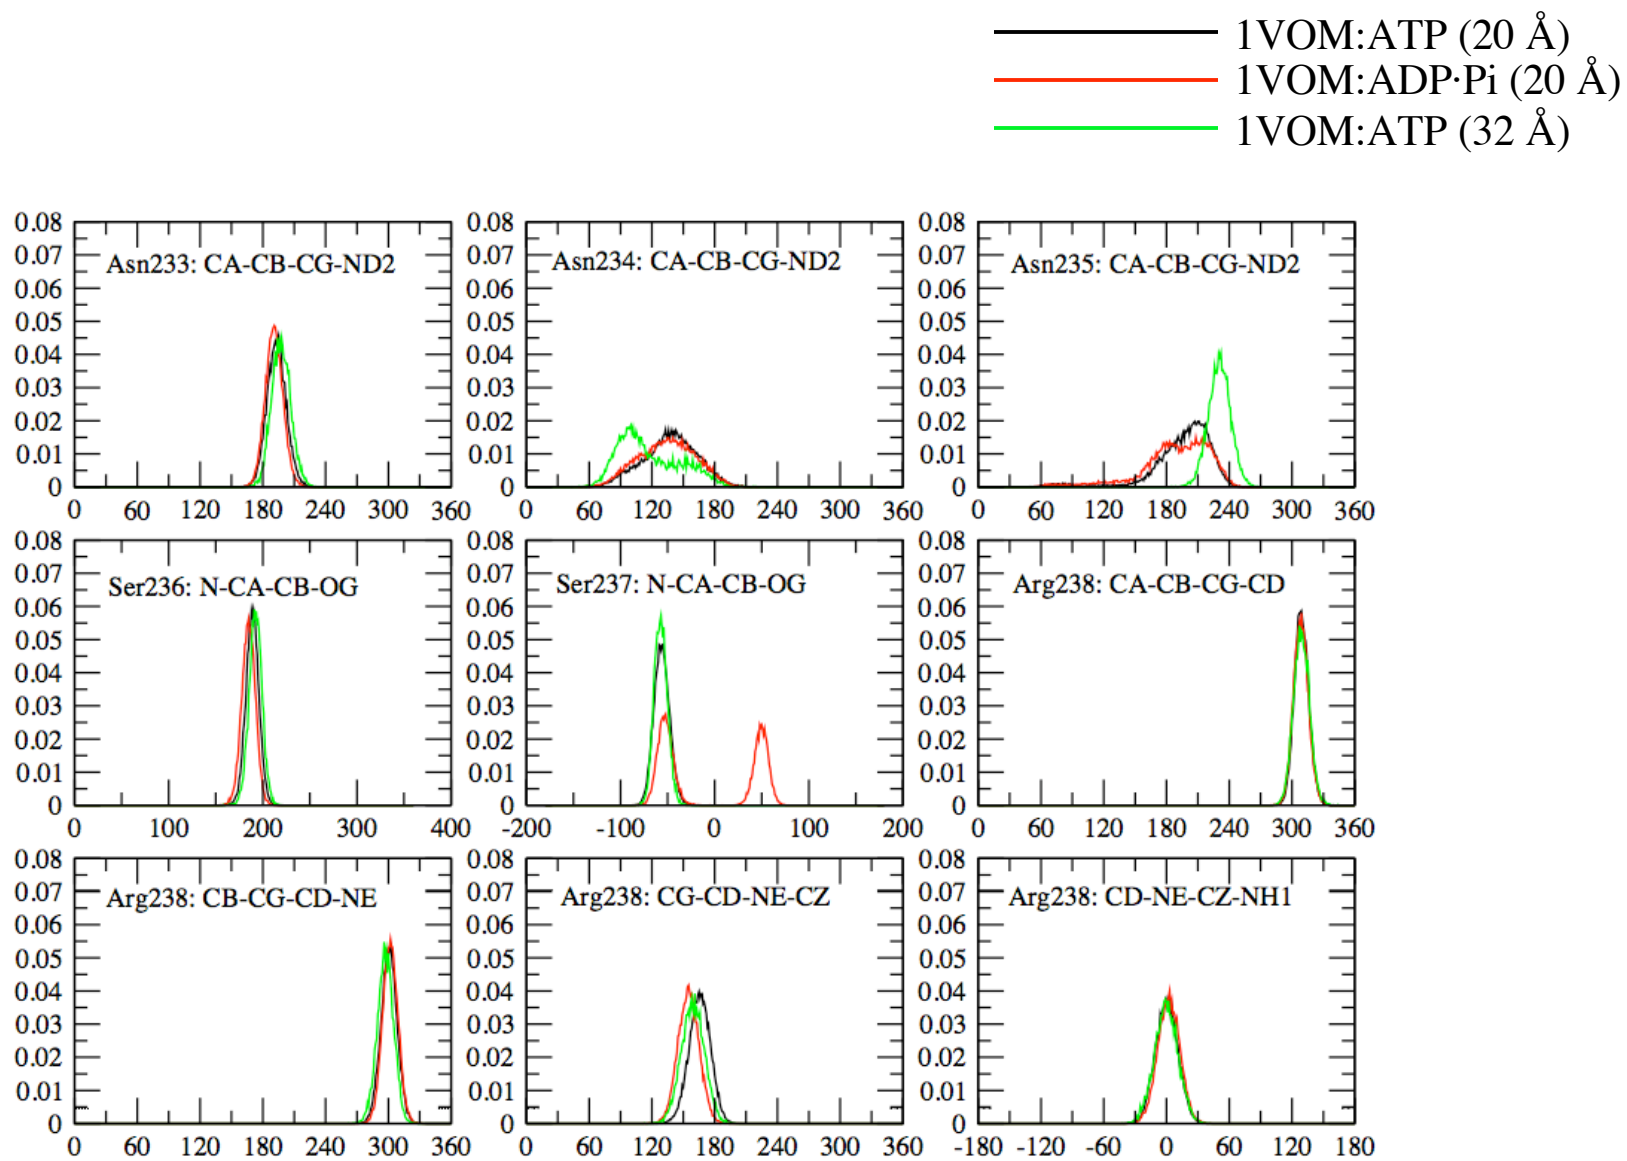

Fig. S2

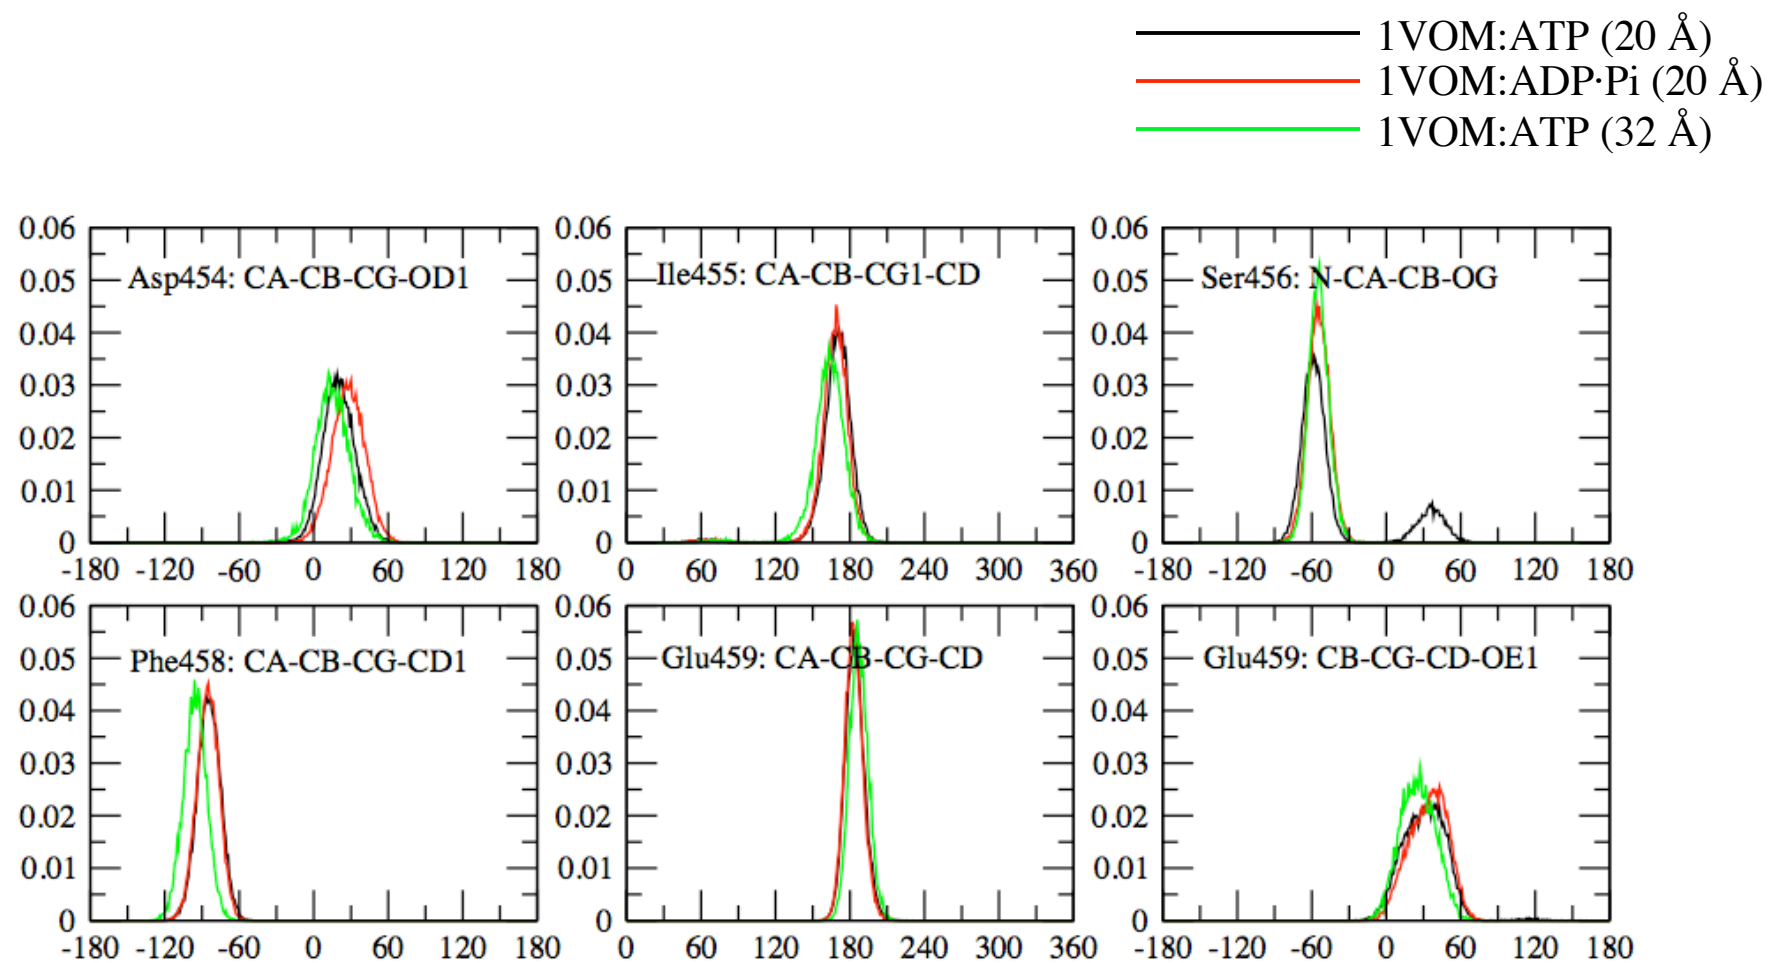

Fig. S3

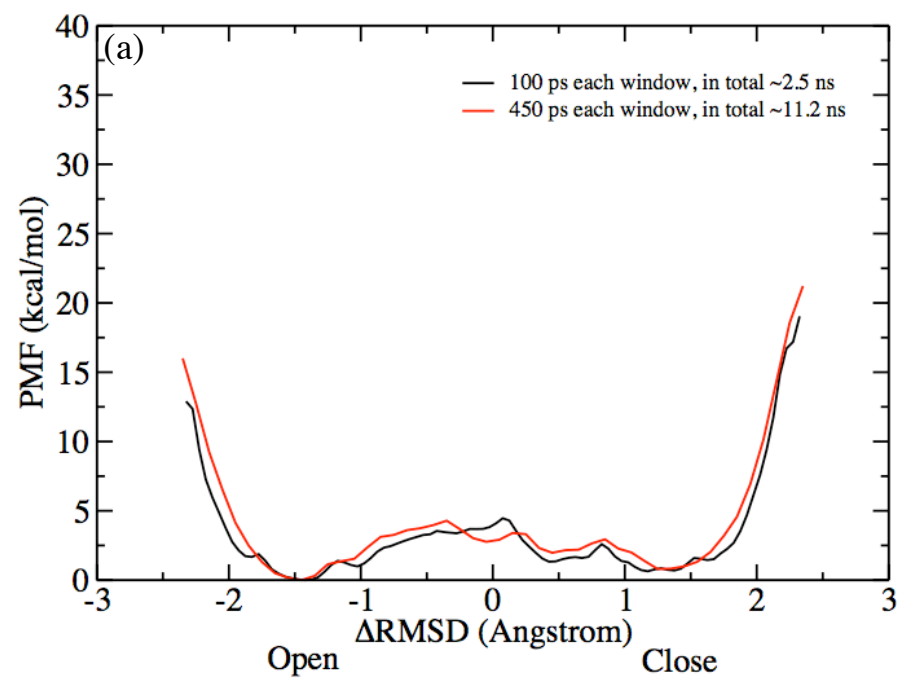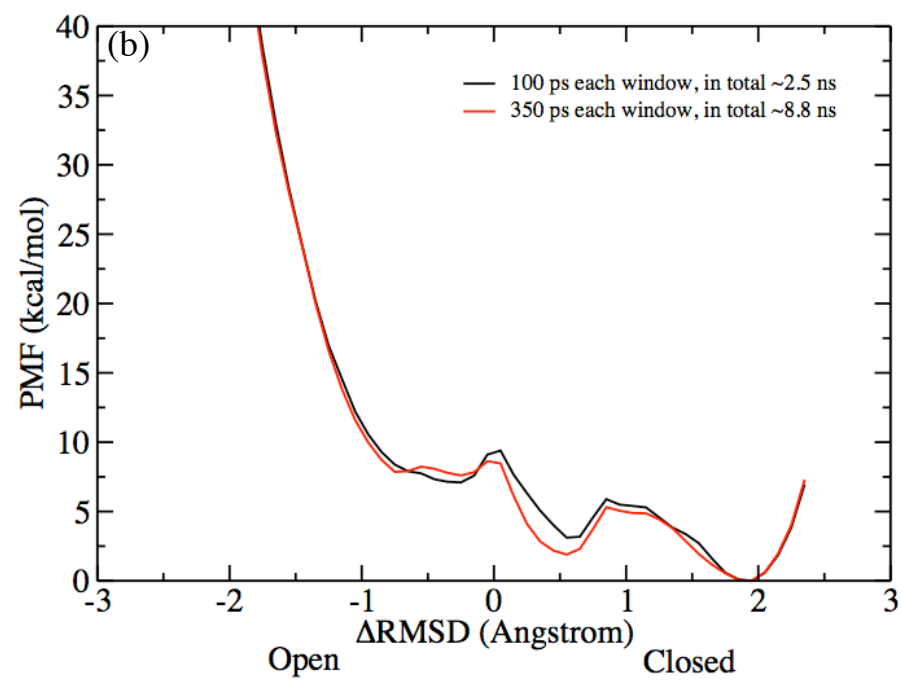

Fig. S4
